# Supplementary material
Source: MDPI journal article supplement (https://www.mdpi.com/2072-4292/15/9/2219)
Supplement: s1 [file s1]

## Supplementary material

Table S1. Abundance and biomass of *Emiliana huxleyi*, total phytoplankton biomass, and coccoliths abundance in 2017

| Station<br>(bottom<br>depth) | Depth  | Emiliana huxleyi      |       |                    |       | Total biomass      |                     | Coccoliths             | N <sub>d</sub> /N <sub>cc</sub> |
|------------------------------|--------|-----------------------|-------|--------------------|-------|--------------------|---------------------|------------------------|---------------------------------|
|                              |        | Cells L <sup>-1</sup> | %     | Mg m <sup>-3</sup> | %     | Mg m <sup>-3</sup> | MgC m <sup>-3</sup> | Coccol L <sup>-1</sup> |                                 |
| 08.06.2017                   |        |                       |       |                    |       |                    |                     |                        |                                 |
| 1 (25 m)                     | 0 m    | 8160000               | 61.81 | 1468.80            | 97.00 | 1514.21            | 202.94              | 288000000              | 60                              |
| 1 (25 m)                     | 5 m    | 6821760               | 81.41 | 1227.92            | 94.70 | 1296.63            | 174.07              | 101376000              | 78                              |
| 1 (25 m)                     | 14 m   | 1044480               | 26.03 | 188.01             | 67.21 | 279.73             | 33.60               | 17408000               | 7                               |
| 1 (25 m)                     | 24,5 m | 520000                | 6.42  | 93.60              | 31.64 | 295.83             | 35.31               | 0                      | 0                               |
|                              |        |                       |       |                    |       |                    |                     |                        |                                 |
| 2 (50 m)                     | 0 m    | 6003200               | 60.03 | 1080.58            | 97.20 | 1111.66            | 148.81              | 250880000              | 70                              |
| 2 (50 m)                     | 5 m    | 6230400               | 70.96 | 1121.47            | 96.59 | 1161.12            | 155.49              | 211456000              | 93                              |
| 2 (50 m)                     | 17 m   | 7740800               | 52.34 | 1393.34            | 94.15 | 1479.94            | 197.61              | 113280000              | 17                              |
| 2 (50 m)                     | 33 m   | 179360                | 11.75 | 32.28              | 42.25 | 76.41              | 7.02                | 188800                 | 0                               |
|                              |        |                       |       |                    |       |                    |                     |                        |                                 |
| 3 (1500 m)                   | 0 m    | 3584000               | 88.97 | 645.12             | 88.71 | 727.24             | 97.18               | 57344000               | 178                             |
| 3 (1500 m)                   | 5 m    | 8691200               | 74.38 | 1564.42            | 96.87 | 1615.04            | 215.65              | 143360000              | 67                              |
| 3 (1500 m)                   | 15 m   | 1971200               | 53.13 | 118.27             | 70.98 | 166.64             | 21.02               | 28672000               | 20                              |
| 3 (1500 m)                   | 30 m   | 140800                | 30.31 | 8.45               | 58.74 | 14.38              | 1.69                | 1408000                | 5                               |
|                              |        |                       |       |                    |       |                    |                     |                        |                                 |
| 4 (50 m)                     | 0 m    | 5664000               | 69.43 | 1019.52            | 96.72 | 1054.11            | 141.44              | 264320000              | 117                             |
| 4 (50 m)                     | 5 m    | 7174400               | 59.62 | 1291.39            | 97.52 | 1324.17            | 177.65              | 90624000               | 20                              |
| 4 (50 m)                     | 15 m   | 4748800               | 43.40 | 854.78             | 90.61 | 943.40             | 121.89              | 101760000              | 21                              |
| 4 (50 m)                     | 30 m   | 2400                  | 0.62  | 0.43               | 3.95  | 10.95              | 0.74                | 115200000              | 600                             |
| 09.06.2017                   |        |                       |       |                    |       |                    |                     |                        |                                 |
| 1 (25 m)                     | 0 m    | 5734400               | 82.42 | 1032.19            | 93.40 | 1105.09            | 148.33              | 86016000               | 80                              |
| 1 (25 m)                     | 5 m    | 7568000               | 66.65 | 1362.24            | 93.79 | 1452.45            | 194.97              | 177408000              | 50                              |
| 1 (25 m)                     | 12 m   | 9049600               | 50.59 | 1628.93            | 95.16 | 1711.83            | 226.95              | 86016000               | 10                              |
| 1 (25 m)                     | 17 m   | 286720                | 4.72  | 51.61              | 45.95 | 112.31             | 11.07               | 8601600                | 2                               |
|                              |        |                       |       |                    |       |                    |                     |                        |                                 |
| 2 (50 m)                     | 0 m    | 4336640               | 67.52 | 780.60             | 94.58 | 825.29             | 110.04              | 40140800               | 22                              |
| 2 (50 m)                     | 4 m    | 8640000               | 73.20 | 1555.20            | 97.64 | 1592.80            | 214.41              | 138240000              | 50                              |
| 2 (50 m)                     | 14 m   | 6220800               | 63.87 | 1119.74            | 97.58 | 1147.54            | 154.88              | 33177600               | 10                              |
| 2 (50 m)                     | 50 m   | 806400                | 41.92 | 145.15             | 88.37 | 164.26             | 20.77               | 197120                 | 0                               |
|                              |        |                       |       |                    |       |                    |                     |                        |                                 |
| 3 (1500 m)                   | 0 m    | 5734400               | 93.40 | 1032.19            | 98.67 | 1046.08            | 141.65              | 86016000               | 267                             |
| 3 (1500 m)                   | 5 m    | 7886400               | 94.12 | 1419.55            | 98.01 | 1448.39            | 195.65              | 162816000              | 533                             |
| 3 (1500 m)                   | 10 m   | 8873600               | 95.88 | 1597.25            | 99.06 | 1612.40            | 218.77              | 75520000               | 273                             |
| 3 (1500 m)                   | 27 m   | 51840                 | 13.82 | 9.33               | 67.62 | 13.80              | 1.56                | 0                      | 0                               |
|                              |        |                       |       |                    |       |                    |                     |                        |                                 |
| 4 (80 m)                     | 4 m    | 7920000               | 92.70 | 1425.60            | 97.57 | 1461.03            | 197.19              | 70400000               | 171                             |
| 4 (80 m)                     | 15 m   | 7040000               | 69.69 | 1267.20            | 98.35 | 1288.51            | 174.09              | 140800000              | 50                              |
| 4 (80 m)                     | 25 m   | 422400                | 58.00 | 76.03              | 93.18 | 81.59              | 10.69               | 704000                 | 3                               |
| 10.06.2017                   |        |                       |       |                    |       |                    |                     |                        |                                 |
| 1 (50 m)                     | 0 m    | 5257600               | 89.26 | 946.37             | 91.67 | 1032.31            | 138.17              | 46131200               | 91                              |
| 1 (50 m)                     | 5 m    | 6809600               | 73.78 | 1225.73            | 98.04 | 1250.27            | 168.83              | 137625600              | 59                              |

|            |      |         |       |         |       |         |        |           |     |
|------------|------|---------|-------|---------|-------|---------|--------|-----------|-----|
| 1 (50 m)   | 14 m | 7744000 | 92.14 | 1393.92 | 98.43 | 1416.13 | 191.84 | 84480000  | 156 |
| 1 (50 m)   | 20 m | 345600  | 45.08 | 62.21   | 92.27 | 67.42   | 8.86   | 207360    | 1   |
| 1 (50 m)   | 25 m | 53760   | 2.57  | 9.68    | 36.45 | 26.55   | 2.28   | 716800    | 0   |
|            |      |         |       |         |       |         |        |           |     |
| 2 (500 m)  | 0 m  | 6272000 | 84.58 | 1128.96 | 98.23 | 1149.26 | 155.40 | 114688000 | 120 |
| 2 (500 m)  | 5 m  | 6739200 | 86.69 | 1213.06 | 99.10 | 1224.05 | 165.91 | 76032000  | 83  |
| 2 (500 m)  | 10 m | 8073600 | 91.95 | 1453.25 | 98.31 | 1478.28 | 199.64 | 37120000  | 67  |
| 2 (500 m)  | 25 m | 143360  | 29.37 | 25.80   | 79.54 | 32.44   | 3.97   | 143360    | 1   |
| 2 (500 m)  | 33 m | 35840   | 9.39  | 6.45    | 34.80 | 18.54   | 1.79   | 161280    | 1   |
|            |      |         |       |         |       |         |        |           |     |
| 3 (1000 m) | 0 m  | 4825600 | 64.82 | 868.61  | 96.62 | 899.02  | 120.56 | 63104000  | 28  |
| 3 (1000 m) | 5 m  | 6419200 | 92.12 | 1155.46 | 97.46 | 1185.57 | 159.31 | 37760000  | 111 |
| 3 (1000 m) | 10 m | 6444800 | 92.38 | 1160.06 | 98.42 | 1178.72 | 159.15 | 74624000  | 206 |
| 3 (1000 m) | 25 m | 172800  | 34.41 | 31.10   | 88.49 | 35.15   | 4.51   | 69120     | 0   |
| 3 (1000 m) | 33 m | 4240    | 0.92  | 0.76    | 13.73 | 5.56    | 0.42   | 237440    | 1   |
|            |      |         |       |         |       |         |        |           |     |
| 4 (50 m)   | 0 m  | 7052800 | 69.49 | 1269.50 | 98.01 | 1295.28 | 174.95 | 103936000 | 35  |
| 4 (50 m)   | 4 m  | 9651200 | 82.40 | 1737.22 | 98.09 | 1771.13 | 238.78 | 89088000  | 48  |
| 4 (50 m)   | 13 m | 5753600 | 58.67 | 1035.65 | 96.78 | 1070.05 | 142.95 | 11136000  | 3   |
| 4 (50 m)   | 22 m | 55680   | 33.12 | 10.02   | 52.75 | 19.00   | 1.93   | 0         | 0   |
|            |      |         |       |         |       |         |        |           |     |
| 5 (25 m)   | 0 m  | 7168000 | 90.63 | 1290.24 | 98.60 | 1308.51 | 176.89 | 157696000 | 264 |
| 5 (25 m)   | 4 m  | 7113600 | 90.74 | 1280.45 | 99.09 | 1292.16 | 175.23 | 143001600 | 235 |
| 5 (25 m)   | 8 m  | 8393600 | 69.80 | 1510.85 | 96.41 | 1567.03 | 209.48 | 46848000  | 15  |
| 5 (25 m)   | 15 m | 742400  | 18.30 | 133.63  | 54.72 | 244.20  | 29.01  | 7424000   | 3   |
| 11.06.2017 |      |         |       |         |       |         |        |           |     |
| 1 (25 m)   | 0 m  | 7808000 | 22.05 | 1405.44 | 91.68 | 1532.94 | 197.56 | 609024000 | 22  |
| 1 (25 m)   | 2 m  | 9302400 | 64.02 | 1674.43 | 93.71 | 1786.77 | 235.10 | 116736000 | 27  |
| 1 (25 m)   | 9 m  | 8166400 | 49.47 | 1469.95 | 94.71 | 1552.04 | 205.22 | 89088000  | 12  |
| 1 (25 m)   | 15 m | 185600  | 30.87 | 33.41   | 69.24 | 48.25   | 5.86   | 111360    | 0   |
|            |      |         |       |         |       |         |        |           |     |
| 2 (50 m)   | 0 m  | 7392000 | 75.20 | 1330.56 | 96.55 | 1378.10 | 184.05 | 95040000  | 45  |
| 2 (50 m)   | 2 m  | 7174400 | 43.93 | 1291.39 | 96.96 | 1331.90 | 178.63 | 22656000  | 3   |
| 2 (50 m)   | 8 m  | 9628800 | 70.00 | 1733.18 | 93.58 | 1852.11 | 243.55 | 75520000  | 20  |
| 2 (50 m)   | 15 m | 981760  | 15.01 | 176.72  | 87.42 | 202.16  | 25.69  | 6796800   | 1   |
|            |      |         |       |         |       |         |        |           |     |
| 3 (80 m)   | 0 m  | 5380800 | 82.29 | 968.54  | 97.51 | 993.26  | 133.73 | 135936000 | 135 |
| 3 (80 m)   | 2 m  | 5011200 | 44.04 | 902.02  | 95.84 | 941.13  | 125.19 | 89088000  | 15  |
| 3 (80 m)   | 9 m  | 8064000 | 61.98 | 1451.52 | 49.35 | 2941.26 | 257.11 | 71680000  | 17  |
| 3 (80 m)   | 15 m | 2784000 | 84.66 | 501.12  | 93.82 | 534.14  | 69.92  | 1484800   | 4   |
|            | max  | 9651200 | 96    | 1737.22 | 99    | 2941    | 257    | 609024000 | 600 |
|            | min  | 2400    | 0.62  | 0.43    | 3.95  | 6       | 0      | 0         | 0   |

Table S2. Abundance and biomass of *Emiliana huxleyi*, total phytoplankton biomass, and coccoliths abundance in 2022.

| Station | Depth, m | <i>Emiliana huxleyi</i> | Total biomass | Coccoliths | N <sub>cl</sub> /N <sub>cc</sub> |
|---------|----------|-------------------------|---------------|------------|----------------------------------|
|---------|----------|-------------------------|---------------|------------|----------------------------------|

| (bottom depth) |      | Cells L <sup>-1</sup> | %     | Mg m <sup>-3</sup> | %     | Mg m <sup>-3</sup> | Mg C m <sup>-3</sup> | Coccol L <sup>-1</sup> |     |
|----------------|------|-----------------------|-------|--------------------|-------|--------------------|----------------------|------------------------|-----|
| 06.06.2022     |      |                       |       |                    |       |                    |                      |                        |     |
| 3 (50 m)       | 0    | 11040                 | 0.40  | 2.0                | 2.32  | 85.7               | 4.2                  | 1766400                | 160 |
| 3 (50 m)       | 10   | 4080000               | 59.09 | 738.7              | 90.87 | 812.9              | 109.0                | 61440000               | 15  |
| 3 (50 m)       | 22   | 240000                | 12.70 | 43.2               | 56.60 | 76.3               | 9.1                  | 768000                 | 3   |
| 3 (50 m)       | 48   | 36000                 | 0.70  | 9.0                | 15.38 | 58.5               | 3.2                  | 120000                 | 3   |
|                |      |                       |       |                    |       |                    |                      |                        |     |
| 4 (250 m)      | 0    | 6809600               | 69.12 | 408.6              | 88.45 | 461.9              | 67.5                 | 86016000               | 13  |
| 4 (250 m)      | 6    | 9120000               | 86.28 | 547.2              | 93.68 | 584.1              | 86.2                 | 38400000               | 4   |
| 4 (250 m)      | 22   | 134400                | 49.53 | 8.1                | 51.81 | 15.6               | 1.7                  | 17920                  | 0   |
| 4 (250 m)      | 50   | 8960                  | 0.22  | 5.6                | 25.98 | 21.7               | 1.5                  | 358400                 | 40  |
|                |      |                       |       |                    |       |                    |                      |                        |     |
| 5 (500 m)      | 0    | 7104000               | 63.82 | 426.2              | 90.26 | 472.3              | 68.1                 | 11366400               | 2   |
| 5 (500 m)      | 7    | 8524800               | 67.85 | 511.5              | 84.51 | 605.3              | 87.9                 | 28416000               | 3   |
| 5 (500 m)      | 29   | 105600                | 19.00 | 6.3                | 34.38 | 18.4               | 1.9                  | 42240                  | 0   |
| 5 (500 m)      | 39   | 2534400               | 48.48 | 152.1              | 86.45 | 175.9              | 24.6                 | 316800                 | 0   |
| 11.06.2022     |      |                       |       |                    |       |                    |                      |                        |     |
| 1 (40 m)       | 0    | 4788504               | 90.98 | 862.2              | 88.87 | 970.1              | 129.0                | 12096000               | 3   |
| 1 (40 m)       | 10   | 5286872               | 66.74 | 951.8              | 91.58 | 1039.4             | 138.5                | 2265600                | 0   |
|                |      |                       |       |                    |       |                    |                      |                        |     |
| 2 (50 m)       | 0    | 4300800               | 54.51 | 774.1              | 90.13 | 858.9              | 112.2                | 1638400                | 0   |
| 2 (50 m)       | 10   | 4505600               | 50.31 | 811.0              | 91.52 | 886.2              | 116.6                | 3276800                | 1   |
|                |      |                       |       |                    |       |                    |                      |                        |     |
| 3 (80 m)       | 0    | 4608000               | 68.81 | 829.4              | 89.80 | 923.6              | 123.5                | 1843200                | 0   |
| 3 (80 m)       | 6    | 5280000               | 93.15 | 950.4              | 94.18 | 1009.1             | 135.7                | 105600                 | 0   |
| 3 (80 m)       | 30   | 261120                | 36.22 | 47.0               | 48.69 | 96.5               | 9.7                  | 65280                  | 0   |
| 3 (80 m)       | 50   | 84480                 | 47.53 | 53.2               | 88.03 | 60.5               | 7.1                  | 0                      | 0   |
|                |      |                       |       |                    |       |                    |                      |                        |     |
| 4 (1400 m)     | 12   | 9292800               | 71.76 | 1672.7             | 96.81 | 1727.8             | 231.8                | 202752000              | 22  |
| 14.06.2022     |      |                       |       |                    |       |                    |                      |                        |     |
| 1 (50 m)       | 0    | 5446400               | 95.01 | 980.4              | 97.72 | 1003.2             | 135.4                | 11366400               | 2   |
| 1 (50 m)       | 10   | 1766400               | 81.24 | 318.0              | 79.99 | 397.5              | 52.2                 | 4416000                | 3   |
| 1 (50 m)       | 24   | 156160                | 24.64 | 28.1               | 60.18 | 46.7               | 5.4                  | 39040                  | 0   |
| 1 (50 m)       | 47   | 22720                 | 9.67  | 4.1                | 44.81 | 9.1                | 1.0                  | 45440                  | 2   |
|                |      |                       |       |                    |       |                    |                      |                        |     |
| 2 (500 m)      | 0    | 6323200               | 94.92 | 1138.2             | 96.04 | 1185.1             | 159.6                | 24960000               | 4   |
| 2 (500 m)      | 10   | 6658560               | 91.04 | 1218.1             | 92.26 | 1320.4             | 176.9                | 4352000                | 1   |
| 2 (500 m)      | 20   | 133032                | 33.32 | 24.2               | 44.41 | 54.5               | 5.2                  | 0                      | 0   |
| 2 (500 m)      | 35   | 84480                 | 24.56 | 34.2               | 51.00 | 67.1               | 6.3                  | 0                      | 0   |
| 2 (500 m)      | 50   | 17600                 | 12.07 | 11.1               | 68.78 | 16.1               | 1.6                  | 0                      | 0   |
| 2 (500 m)      | 70   | 21600                 | 17.84 | 3.8                | 57.01 | 6.6                | 0.7                  | 34560                  | 2   |
| 17.06.2022     |      |                       |       |                    |       |                    |                      |                        |     |
| 1 (50 m)       | 0    | 13209600              | 96.49 | 2377.7             | 97.85 | 2430.1             | 328.3                | 12288000               | 1   |
| 1 (50 m)       | 12   | 6080000               | 94.91 | 1094.4             | 94.90 | 1153.2             | 154.8                | 13376000               | 2   |
| 1 (50 m)       | 30,5 | 107520                | 22.18 | 19.4               | 52.05 | 37.2               | 3.8                  | 179200                 | 2   |
| 1 (50 m)       | 48   | 48960                 | 1.76  | 8.8                | 39.73 | 22.2               | 1.9                  | 32640                  | 1   |
|                |      |                       |       |                    |       |                    |                      |                        |     |
| 2 (500 m)      | 0    | 8537600               | 95.81 | 1536.8             | 97.69 | 1573.1             | 212.1                | 7424000                | 1   |

|           |     |          |       |        |       |        |       |           |     |
|-----------|-----|----------|-------|--------|-------|--------|-------|-----------|-----|
| 2 (500 m) | 11  | 6774400  | 93.38 | 1219.4 | 92.61 | 1316.7 | 176.7 | 28032000  | 4   |
| 2 (500 m) | 29  | 78080    | 24.96 | 14.1   | 52.09 | 27.0   | 2.8   | 58560     | 1   |
| 2 (500 m) | 50  | 58880    | 33.30 | 10.6   | 44.82 | 23.6   | 2.2   | 29440     | 1   |
| 2 (500 m) | 70  | 4100     | 3.95  | 0.7    | 16.01 | 4.7    | 0.3   | 16320     | 4   |
|           | max | 13209600 | 96.49 | 2377.7 | 97.85 | 2430.1 | 328.3 | 202752000 | 160 |
|           | min | 4100     | 0     | 1      | 0     | 5      | 0     | 0         | 0   |
